# Supplementary material for: Antibodies Targeting the Transferrin Receptor 1 (TfR1) as Direct Anti-cancer Agents
Source: PubMed Central journal article supplement (PMC8010148; doi:10.3389/fimmu.2021.607692), 2021-03-17
Supplement: Table_1.pdf [file Table_1.pdf]

**Supplementary Table I: Anti-TfR1 antibodies that show direct anti-cancer activity.**

| Antibody name | Class and subclass | Targeted TfR1 species | Inhibits binding of Tf * | Anti-cancer Activity                                                                                                                                                                                                                                                                                                                                                                                                                                                                                                                                                                                                                                                    | References     |
|---------------|--------------------|-----------------------|--------------------------|-------------------------------------------------------------------------------------------------------------------------------------------------------------------------------------------------------------------------------------------------------------------------------------------------------------------------------------------------------------------------------------------------------------------------------------------------------------------------------------------------------------------------------------------------------------------------------------------------------------------------------------------------------------------------|----------------|
| RI7 208       | Rat IgM            | Mouse                 | No                       | <i>In vitro</i><br>Inhibits proliferation of murine myeloma and lymphoma cell lines.<br><i>In vivo</i><br>Increases survival in a syngeneic murine model of leukemia (s.c. inoculation).                                                                                                                                                                                                                                                                                                                                                                                                                                                                                | (92, 114-116)  |
| REM 17.2      | Rat IgM            | Mouse                 | No                       | <i>In vitro</i><br>Inhibits cancer cell proliferation.                                                                                                                                                                                                                                                                                                                                                                                                                                                                                                                                                                                                                  | (92,116)       |
| RI7 217       | Rat IgG2a          | Mouse                 | No                       | <i>In vitro</i><br>Inhibits proliferation of a murine T-cell lymphoma cell line, enhanced in the presence of a cross-linking antibody.                                                                                                                                                                                                                                                                                                                                                                                                                                                                                                                                  | (92)           |
| D18           | Mouse IgG2a        | Chicken               | No                       | <i>In vitro</i><br>Inhibits proliferation and induces caspase-independent cell death in a chicken B-lymphoid tumor cell line.                                                                                                                                                                                                                                                                                                                                                                                                                                                                                                                                           | (117-118)      |
| D19           | Mouse IgG2a        | Chicken               | No                       | <i>In vitro</i><br>Inhibits proliferation and induces caspase-independent cell death in a chicken B-lymphoid tumor cell line.                                                                                                                                                                                                                                                                                                                                                                                                                                                                                                                                           | (117-118)      |
| 7579          | Mouse IgG          | Human                 | ND                       | <i>In vitro</i><br>Inhibits proliferation and induces apoptosis of glioma, hepatoma, and breast cancer cell lines.<br>In combination with curcumin induces necrosis in glioma cell lines.<br>In combination with nimustine induces synergistic cytotoxic effects in glioma cell lines.<br>In combination with 5-fluorouracil, synergistically increases necrosis of breast and hepatocellular cancer cell lines.<br>In combination with doxorubicin, additively increases necrosis of breast and hepatocellular cancer cell lines.<br>In combination with sinomenine hydrochloride, decreases proliferation and induces apoptosis in a hepatocellular cancer cell line. | (120-122, 132) |
| E2.3          | Mouse IgG1         | Human                 | ND                       | <i>In vitro</i><br>Inhibits proliferation of MM and breast cancer cell lines in combination with the antibody A27.15.                                                                                                                                                                                                                                                                                                                                                                                                                                                                                                                                                   | (125, 133)     |
| A27.15        | Mouse IgG1         | Human                 | No                       | <i>In vitro</i><br>Inhibits proliferation of MM and breast cancer cell lines in combination with the antibody E2.3.<br><i>In vivo</i><br>In combination with the antibody D65.30 inhibits T-cell leukemia tumor growth in a murine xenograft model.                                                                                                                                                                                                                                                                                                                                                                                                                     | (125, 133)     |

|           |                                                  |       |     |                                                                                                                                                                                                                                                                                                                                                                                                                   |                                |
|-----------|--------------------------------------------------|-------|-----|-------------------------------------------------------------------------------------------------------------------------------------------------------------------------------------------------------------------------------------------------------------------------------------------------------------------------------------------------------------------------------------------------------------------|--------------------------------|
| B3/25     | Mouse IgG1                                       | Human | No  | <b><i>In vitro</i></b><br>Inhibits proliferation of human AML cell lines.                                                                                                                                                                                                                                                                                                                                         | (126)                          |
| 43/31     | Mouse IgG                                        | Human | Yes | <b><i>In vitro</i></b><br>Inhibits proliferation of human AML cell lines.                                                                                                                                                                                                                                                                                                                                         | (126)                          |
| D65.30    | Mouse IgG1                                       | Human | No  | <b><i>In vitro</i></b><br>Inhibits proliferation of a human ALL (T-cell origin) cell line.<br><b><i>In vivo</i></b><br>Limited inhibition of s.c. implanted human ALL (T-cell origin) tumor growth in a murine xenograft model as a single agent and with increased effectiveness when combined with the antibody A27.15.                                                                                         | (127)                          |
| A24       | Mouse IgG2b                                      | Human | Yes | <b><i>In vitro</i></b><br>Inhibits proliferation and induces apoptosis of ATLL, AML, and MCL cell lines.<br><b><i>In vivo</i></b><br>Abrogates human AML and MCL tumor formation in a s.c. mouse xenograft model. Inhibits tumor growth in a delayed tumor growth model.                                                                                                                                          | (94, 119, 128)                 |
| RBC4      | Mouse IgM                                        | Human | ND  | <b><i>In vitro</i></b><br>Inhibits proliferation and induces cell death in human CML, ALL (T-cell origin), TCL, and AML cell lines.                                                                                                                                                                                                                                                                               | (135)                          |
| 42/6      | Mouse IgA                                        | Human | Yes | <b><i>In vitro</i></b><br>Inhibits proliferation of human ALL (T-cell origin), AML, and melanoma cell lines.<br><b><i>In vivo</i></b><br>Phase I clinical trial showed out of 27 patients with various malignancies, 3 showed mixed anti-tumor response, one with follicular small cleaved cell lymphoma, one with HL, and one with CLL.                                                                          | (124, 126-127, 130, -131, 136) |
| D2C       | Mouse/human chimeric IgG1 (Fv from 7579)         | Human | ND  | <b><i>In vitro</i></b><br>Inhibits proliferation and induces apoptosis in an erythroleukemia cell line. Induces ADCC against erythroleukemia, ALL (T-cell origin), and hepatocellular cancer cell lines. Induces CDC against ALL (T-cell origin) and hepatocellular cancer cell lines. In combination with curcumin, enhances anti-cancer activity in a castration resistant prostate cancer cell line.           | (139-141)                      |
| ch128.1Av | Mouse/human chimeric IgG3-Avidin (Fv from 128.1) | Human | No  | <b><i>In vitro</i></b><br>Exhibits anti-proliferative/pro-apoptotic activity in human MM, AML, BL, B-lymphoblastoid cells, TCL, and erythroleukemia cell lines. Enhances anti-cancer cytotoxic effects when used in combination with gambogic acid, HXR9, or cisplatin.<br><b><i>In vivo</i></b><br>Increases survival in a disseminated xenograft murine models of human MM, though less effective than ch128.1. | (96, 144, 152-154)             |
| chOX26Av  | Mouse/human chimeric IgG3-Avidin                 | Rat   | No  | <b><i>In vitro</i></b><br>Exhibits anti-proliferative/pro-apoptotic activity in rat myeloma and T-cell lymphoma cell lines.                                                                                                                                                                                                                                                                                       | (145)                          |

|              |                                                       |       |     |                                                                                                                                                                                                                                                                                                                                                                                                                       |                        |
|--------------|-------------------------------------------------------|-------|-----|-----------------------------------------------------------------------------------------------------------------------------------------------------------------------------------------------------------------------------------------------------------------------------------------------------------------------------------------------------------------------------------------------------------------------|------------------------|
| ch128.1/IgG3 | (Fv from OX26)<br>Mouse/human IgG3<br>(Fv from 128.1) | Human | No  | <b><i>In vitro</i></b><br>Inhibits proliferation and induces apoptosis of certain hematopoietic malignant cell lines such as B-lymphoblastoid cell lines.<br>Induces ADCC and ADCP against malignant B cell lines.<br><b><i>In vivo</i></b><br>Increases survival in disseminated xenograft models of human MM. Increases survival in a xenograft model of AIDS-NHL where cells were inoculated i.p.                  | (95-96, 142, 144, 160) |
| ch128.1/IgG1 | Mouse/human IgG1<br>(Fv from 128.1)                   | Human | No  | <b><i>In vitro</i></b><br>Induces ADCC and ADCP against a MM cell line.<br><b><i>In vivo</i></b><br>Increases survival in disseminated xenograft models of human MM and AIDS-NHL.<br>In combination with either lenalidomide or bortezomib, improves survival in disseminated xenograft models of human MM compared to the single agents alone.<br>Inhibits EBV-driven lymphomagenesis in mice bearing human B cells. | (163, 166-168)         |
| hu128.1      | Humanized IgG1<br>(Fv from 128.1)                     | Human | No  | <b><i>In vivo</i></b><br>Increases survival in disseminated xenograft models of human AIDS-NHL.                                                                                                                                                                                                                                                                                                                       | (167)                  |
| 3TF12        | Fv                                                    | Human | Yes | <b><i>In vitro</i></b><br>Inhibits proliferation and decreased viability of human TCL, erythroleukemia, BL, histiocytic lymphoma, and AML cell lines.                                                                                                                                                                                                                                                                 | (170)                  |
| 3GH7         | scFv                                                  | Human | Yes | <b><i>In vitro</i></b><br>Inhibits proliferation and decreased viability of human TCL, erythroleukemia, BL, histiocytic lymphoma, and AML cell lines.                                                                                                                                                                                                                                                                 |                        |
| H7CH         | Bivalent scFv                                         | Human | Yes | <b><i>In vitro</i></b><br>Inhibits proliferation and induces apoptosis of an erythroleukemia cell line.                                                                                                                                                                                                                                                                                                               | (170)                  |
| F12CH **     | Bivalent scFv                                         | Human | Yes | <b><i>In vitro</i></b><br>Inhibits proliferation and induces apoptosis of an erythroleukemia cell line.<br>Inhibition of proliferation is rescued by iron supplementation.<br><b><i>In vivo</i></b><br>Inhibits tumor growth of erythroleukemia cells in a s.c. xenograft mouse model.                                                                                                                                | (170)                  |
| scFv HAK     | Intra-cellular scFv                                   | Human | Yes | <b><i>In vitro</i></b><br>Inhibits proliferation and induces apoptosis in a human breast cancer cell line.                                                                                                                                                                                                                                                                                                            | (171)                  |
| H7-Fc **     | scFv-Fc ***                                           | Human | Yes | <b><i>In vitro</i></b><br>Induces apoptosis in human erythroleukemia and BL cell lines.<br>Induces ADCC against mastocytoma leukemic cells and lymphoma cell lines.<br><b><i>In vivo</i></b><br>Tumor regression was observed in a s.c. erythroleukemia xenograft mouse model.                                                                                                                                        | (175)                  |

|                       |                          |       |     |                                                                                                                                                                                                                                                                                                                                                                                                                                                                                                                                                                                          |           |
|-----------------------|--------------------------|-------|-----|------------------------------------------------------------------------------------------------------------------------------------------------------------------------------------------------------------------------------------------------------------------------------------------------------------------------------------------------------------------------------------------------------------------------------------------------------------------------------------------------------------------------------------------------------------------------------------------|-----------|
| Anti-TFRC             | Fully human IgG1         | Human | Yes | <b><i>In vitro</i></b><br>Inhibits proliferation and induces apoptosis in human OSCC cell lines.<br>Induces ADCC against OSCC cell lines.<br><b><i>In vivo</i></b><br>Inhibits human OSCC tumor growth in a murine xenograft model.                                                                                                                                                                                                                                                                                                                                                      | (41)      |
| JST-TFR09 (PPMX-T003) | Fully human IgG1         | Human | Yes | <b><i>In vitro</i></b><br>Inhibits proliferation and increases apoptosis in ATLL, AML, erythroleukemia, and anaplastic large cell lymphoma cell lines.<br>Induces ADCC against an ATLL cell line.<br><b><i>In vivo</i></b><br>Inhibits human ATLL, cutaneous T-cell lymphoma, large cell lymphoma, AML, and erythroleukemia tumor growth in s.c. xenograft mouse models.<br>Increases survival in disseminated xenograft mouse models of ATLL and ALL (T-cell origin).<br>Showed anti-cancer activity in xenograft mouse models using patient-derived AML cells implanted intratibially. | (173-174) |
| H7-IgG1               | IgG1 (Fv from 3GH7 scFv) | Human | Yes | <b><i>In vitro</i></b><br>Induces apoptosis in human erythroleukemia and BL cell lines.<br>Induces ADCC of mastocytoma leukemic cells and lymphoma cell lines.<br><b><i>In vivo</i></b><br>Tumor regression and increased survival in a s.c. erythroleukemia xenograft mouse model.                                                                                                                                                                                                                                                                                                      | (175)     |

\* *If the antibody inhibits the binding of Tf it is known as a neutralizing antibody.*

\*\* *These antibodies cross-react with mouse TfR1.*

\*\*\* *Two 3GH7 scFv attached to the Fc region of human IgG1.*

*ADCC, antibody-dependent cell-mediated cytotoxicity; ADCP, antibody-dependent cell-mediated phagocytosis; AIDS-NHL, acquired immunodeficiency syndrome associated non-Hodgkin lymphoma; ALL, acute lymphocytic leukemia; AML, acute myeloid leukemia; ATLL, adult T-cell leukemia/lymphoma; BL, Burkitt lymphoma; CDC, complement-mediated cytotoxicity; CLL, chronic lymphocytic leukemia; CML, chronic myeloid leukemia; Fv, variable regions; HL, Hodgkin lymphoma; i.p., intraperitoneal; MCL, mantle cell lymphoma; MM, multiple myeloma; ND, not described; OSCC, oral squamous cell carcinoma; s.c., subcutaneous, TCL, acute T-cell leukemia.*
